# Supplementary figures and images for: Complete Mitogenome and Phylogenetic Analysis of the Carthamus tinctorius L
Source: MDPI journal article supplement (doi:10.3390/genes14050979), 2023-04-26

***Carthamus tinctorius***  
mitochondrial genome  
321,872 bp

***Saussurea costus***  
mitochondrial genome  
320,439 bp

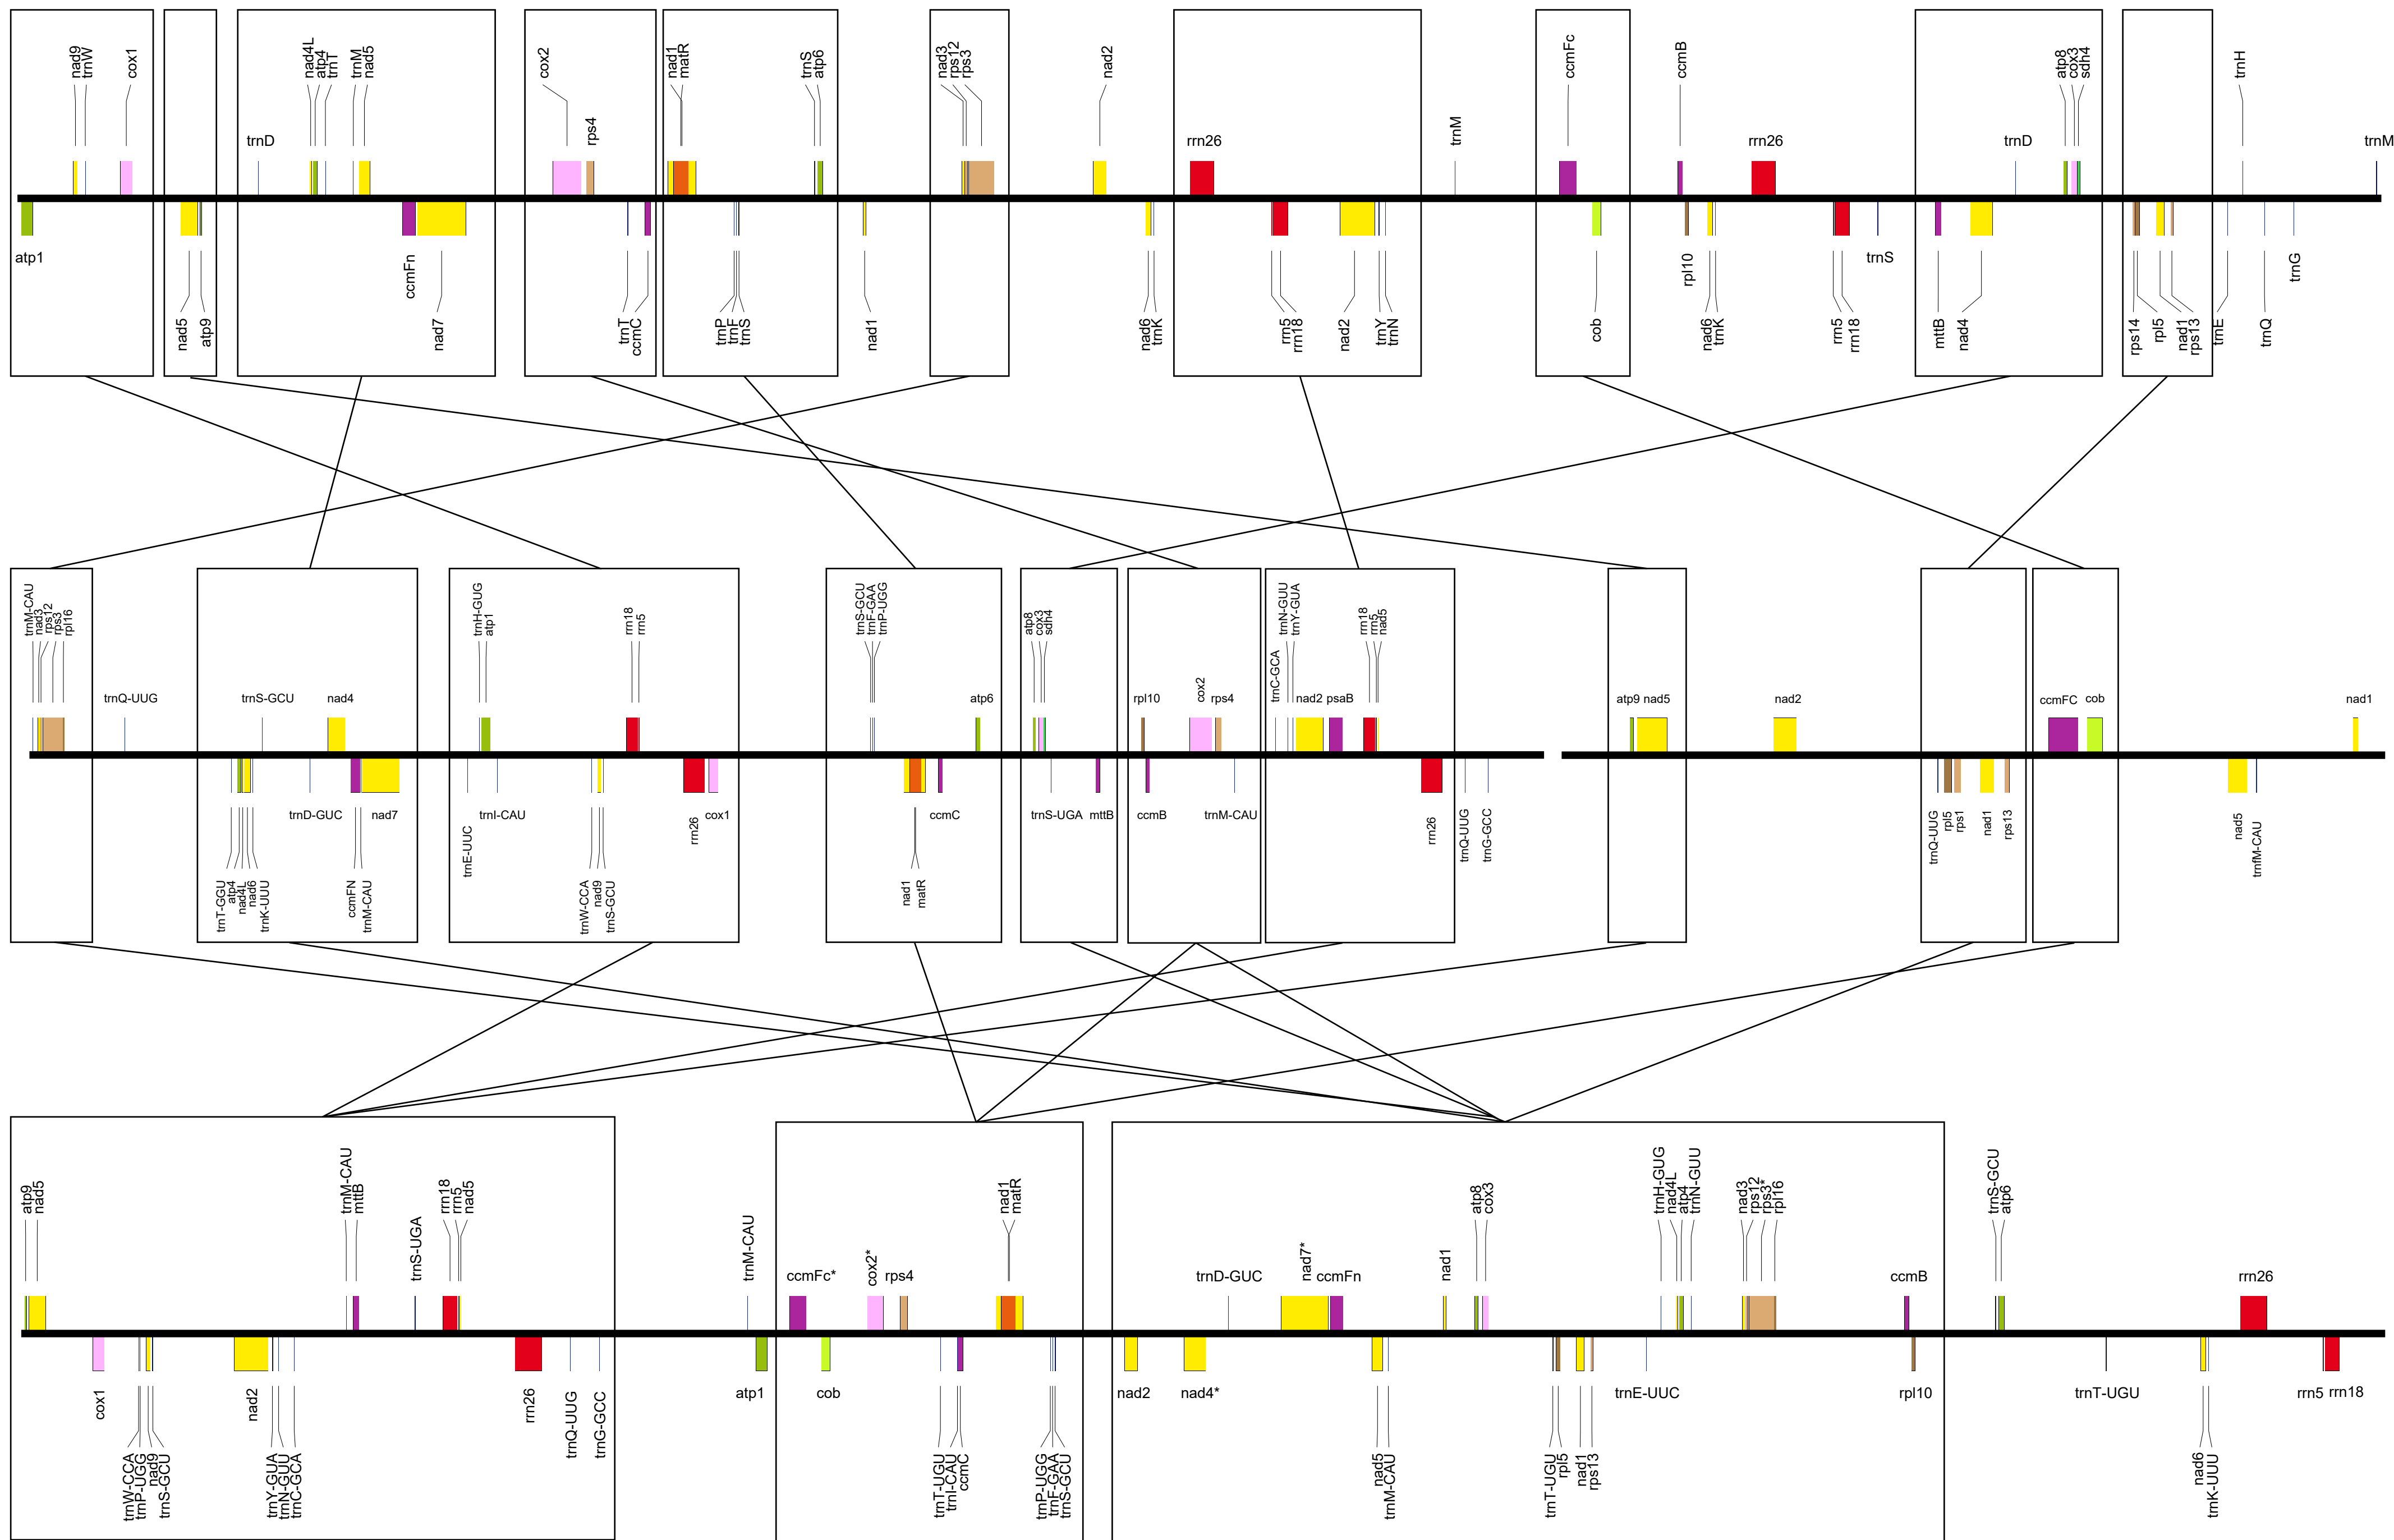

Supplement: s1 [file s1]

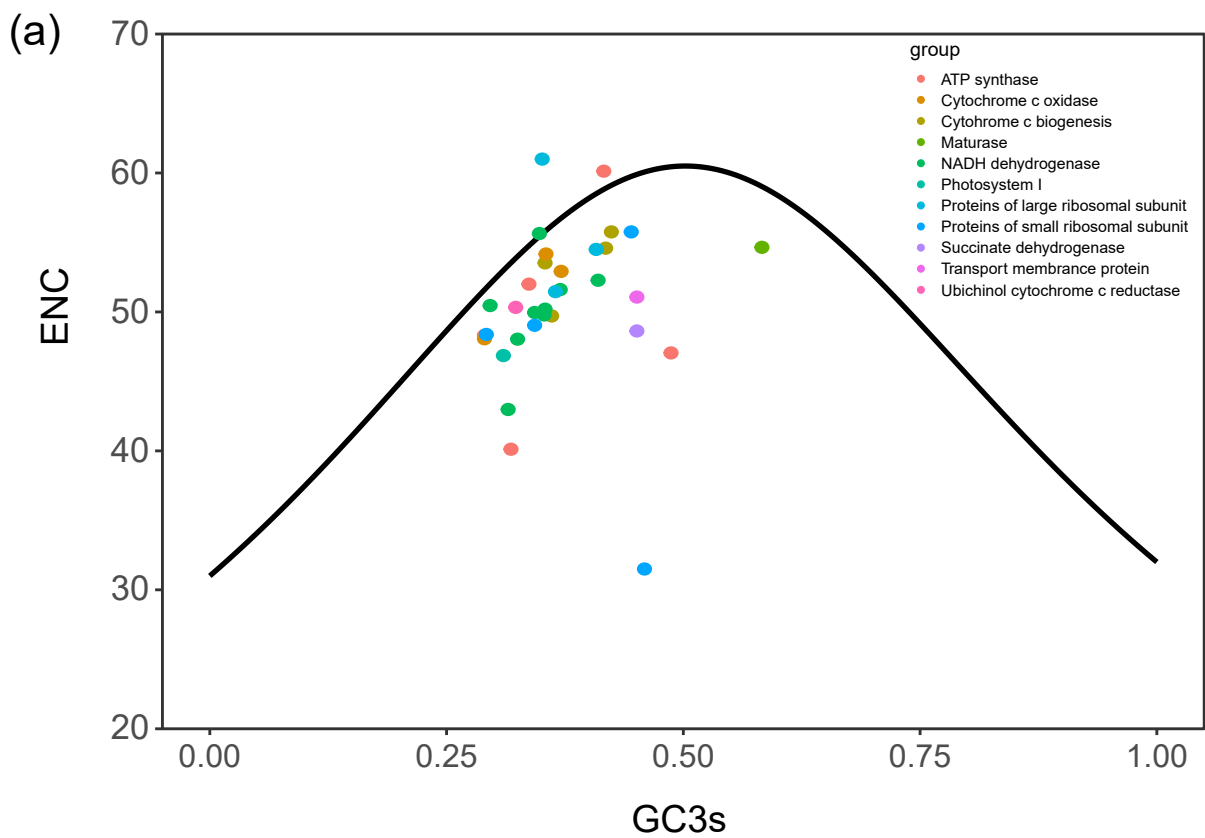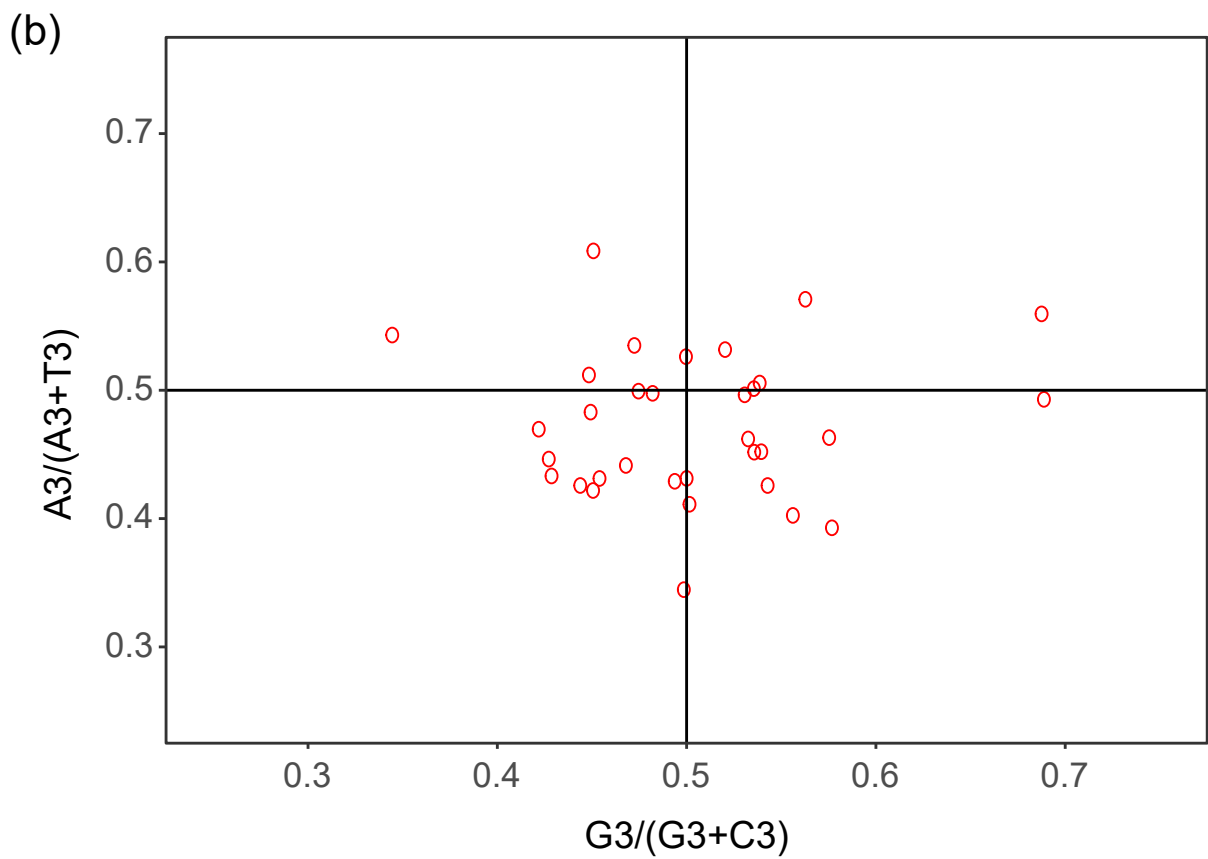

Supplement: s1 [file s1]
